# Supplementary material for: Balanced Sparse Model for Tight Frames in Compressed Sensing Magnetic Resonance Imaging
Source: PLOS journal article supplement (doi:10.1371/journal.pone.0119584), 2015-04-07
Supplement: S1 (10.1371/journal.pone.0119584.s001) [file journal.pone.0119584.s001]

## Appendix A: Proof of (12)

The solution to the minimization in the first line of (11) is obviously given by

$$\alpha_{n+1} = \mathbf{A}^{-1} [\mu \mathbf{\Psi} \mathbf{F}^* \mathbf{U}^* (\mathbf{y} + \mathbf{h}_n) + \rho (\mathbf{z}_n + \mathbf{d}_n)],$$

where

$$\mathbf{A} = \mu \mathbf{\Psi} \mathbf{F}^* \mathbf{U}^* \mathbf{U} \mathbf{F} \mathbf{\Psi}^* + \beta (\mathbf{I} - \mathbf{\Psi} \mathbf{\Psi}^*) + \rho \mathbf{I}. \quad (14)$$

The key step of this proof is to derive the inversion of matrix  $\mathbf{A}$ . We will use the Sherman-Morrison-Woodbury matrix inversion formula [36]

$$(\mathbf{X} + \mathbf{Y} \mathbf{Z})^{-1} = \mathbf{X}^{-1} - \mathbf{X}^{-1} \mathbf{Y} (\mathbf{I} + \mathbf{Z} \mathbf{X}^{-1} \mathbf{Y})^{-1} \mathbf{Z} \mathbf{X}^{-1} \quad (15)$$

provided that  $(\mathbf{I} + \mathbf{Z} \mathbf{X}^{-1} \mathbf{Y})$  is invertible. We will consider the inverse of the last two terms in (14) as follows

$$\mathbf{B} = \beta (\mathbf{I} - \mathbf{\Psi} \mathbf{\Psi}^*) + \rho \mathbf{I} = (\beta + \rho) \mathbf{I} - \beta \mathbf{\Psi} \mathbf{\Psi}^*.$$

Using (15) and the property of a tight frame, we get

$$\begin{aligned} \mathbf{B}^{-1} &= ((\beta + \rho) \mathbf{I} - \beta \mathbf{\Psi} \mathbf{\Psi}^*)^{-1} = \frac{1}{\beta + \rho} \mathbf{I} + \frac{\beta}{\beta + \rho} \mathbf{\Psi} \left( \mathbf{I} - \mathbf{\Psi}^* \frac{\beta}{\beta + \rho} \mathbf{\Psi} \right)^{-1} \mathbf{\Psi}^* \frac{1}{\beta + \rho} \\ &= \frac{1}{\beta + \rho} \mathbf{I} + \frac{\beta}{\rho(\beta + \rho)} \mathbf{\Psi} \mathbf{\Psi}^*, \end{aligned} \quad (16)$$

where we have used the tight frame property  $\mathbf{\Psi}^* \mathbf{\Psi} = \mathbf{I}$ . Then, by using the Sherman-Morrison-Woodbury matrix inversion formula (15) again, the inverse of  $\mathbf{A}$  in (14) is

$$\mathbf{A}^{-1} = (\mathbf{B} + \mu \mathbf{\Psi} \mathbf{F}^* \mathbf{U}^* \mathbf{U} \mathbf{F} \mathbf{\Psi}^*)^{-1} = \mathbf{B}^{-1} - \mathbf{B}^{-1} \mu \mathbf{\Psi} \mathbf{F}^* \mathbf{U}^* (\mathbf{I} + \mathbf{U} \mathbf{F} \mathbf{\Psi}^* \mathbf{B}^{-1} \mu \mathbf{\Psi} \mathbf{F}^* \mathbf{U}^*)^{-1} \mathbf{U} \mathbf{F} \mathbf{\Psi}^* \mathbf{B}^{-1}. \quad (17)$$

Moreover, (16) implies

$$(\mathbf{I} + \mathbf{U} \mathbf{F} \mathbf{\Psi}^* \mathbf{B}^{-1} \mu \mathbf{\Psi} \mathbf{F}^* \mathbf{U}^*)^{-1} = \left( \mathbf{I} + \mathbf{U} \mathbf{F} \mathbf{\Psi}^* \left( \frac{1}{\beta + \rho} \mathbf{I} + \frac{\beta}{\rho(\beta + \rho)} \mathbf{\Psi} \mathbf{\Psi}^* \right) \mu \mathbf{\Psi} \mathbf{F}^* \mathbf{U}^* \right)^{-1} = \frac{\rho}{\rho + \mu} \mathbf{I}.$$

This together with (17) leads to

$$\begin{aligned} \mathbf{A}^{-1} &= \frac{1}{\beta + \rho} \mathbf{I} + \frac{\beta}{\rho(\beta + \rho)} \mathbf{\Psi} \mathbf{\Psi}^* - \frac{\mu}{\rho(\mu + \rho)} \mathbf{\Psi} \mathbf{F}^* \mathbf{U}^* \mathbf{U} \mathbf{F} \mathbf{\Psi}^* \\ &= \frac{1}{\rho} \left[ \gamma \mathbf{I} + (1 - \gamma) \mathbf{\Psi} \mathbf{\Psi}^* - \frac{\mu}{\mu + \rho} \mathbf{\Psi} \mathbf{F}^* \mathbf{U}^* \mathbf{U} \mathbf{F} \mathbf{\Psi}^* \right] \end{aligned}$$

where we have used  $\gamma = \frac{\rho}{\beta + \rho}$  to the role of the balancing parameter  $\beta$ . Finally, the solution of Eq. (17) is

$$\begin{aligned} \alpha_{n+1} &= \mathbf{A}^{-1} [\mu \mathbf{\Psi} \mathbf{F}^* \mathbf{U}^* (\mathbf{y} + \mathbf{h}_n) + \rho (\mathbf{z}_n + \mathbf{d}_n)] \\ &= \frac{1}{\rho} \left[ \gamma \mathbf{I} + (1 - \gamma) \mathbf{\Psi} \mathbf{\Psi}^* - \frac{\mu}{\mu + \rho} \mathbf{\Psi} \mathbf{F}^* \mathbf{U}^* \mathbf{U} \mathbf{F} \mathbf{\Psi}^* \right] [\mu \mathbf{\Psi} \mathbf{F}^* \mathbf{U}^* (\mathbf{y} + \mathbf{h}_n) + \rho (\mathbf{z}_n + \mathbf{d}_n)] \\ &= \frac{\mu}{\mu + \rho} \mathbf{\Psi} \mathbf{F}^* \mathbf{U}^* (\mathbf{y} + \mathbf{h}_n) + \gamma (\mathbf{z}_n + \mathbf{d}_n) + \mathbf{\Psi} \mathbf{F}^* \left[ (1 - \gamma) \mathbf{I} - \frac{\mu}{\mu + \rho} \mathbf{U}^* \mathbf{U} \right] \mathbf{F} \mathbf{\Psi}^* (\mathbf{z}_n + \mathbf{d}_n), \end{aligned}$$

which concludes the proof.
